# Supplementary material
Source: PubMed Central journal article supplement (PMC6645751)
Supplement: ao7b01521_si_001.pdf [file ao7b01521_si_001.pdf]

## SUPPORTING INFORMATION

### **E-cigarette airflow rate modulates toxicant profiles and can lead to concerning levels of solvent consumption**

Tetiana Korzun,<sup>†</sup> Maryana Lazurko,<sup>†</sup> Ian Munhenzva,<sup>†</sup> Kelley C. Barsanti,<sup>‡</sup> Yilin Huang,<sup>‡</sup> R. Paul Jensen,<sup>†</sup> Jorge O. Escobedo,<sup>†</sup> Wentai Luo,<sup>†,§</sup> David H. Peyton,<sup>†</sup> and Robert M. Strongin<sup>†,\*</sup>

<sup>†</sup> Department of Chemistry, Portland State University, 719 SW 10th Avenue, 97207 Portland, Oregon, United States

<sup>‡</sup> Department of Chemical and Environmental Engineering, Center for Environmental Research and Technology, University of California-Riverside, 1084 Columbia Avenue, 92507 Riverside, California, United States

<sup>§</sup> Department of Civil and Environmental Engineering, Maseeh College of Engineering and Computer Science, Portland State University, 1930 SW 4th Avenue, 9720 Portland, Oregon, United States

10 Pages, 2 Tables, 5 Figures

**Table S1.** Representative examples of toxicant concentrations and machine puffing flow rates from the studies assessing emissions from electronic cigarettes.

| Study | Calculated Flow Rate (mL/s) | E-liquid Composition <sup>a</sup>                          | E-Cigarette                                                                                                                                                                             | Acetaldehyde (ng/puff) | Acrolein (ng/puff)  | Formaldehyde (ng/puff) |
|-------|-----------------------------|------------------------------------------------------------|-----------------------------------------------------------------------------------------------------------------------------------------------------------------------------------------|------------------------|---------------------|------------------------|
| 1     | 10                          | PG/GLY mixtures with vanilla flavor; 18 mg/mL of nicotine. | Vision Spinner II B e-cigarette operated at 3.8V with Aerotank Mini by Kangertech (2.0 $\Omega$ coil) vaporizer.                                                                        | 2132 <sup>b</sup>      | 984 <sup>b</sup>    | 10660 <sup>b</sup>     |
|       |                             |                                                            | Vision Spinner II B e-cigarette operated at 3.8 V with CE4 by eGO (2.6 $\Omega$ coil) vaporizer.                                                                                        | 9282 <sup>b</sup>      | 8670 <sup>b</sup>   | 45645 <sup>b</sup>     |
|       |                             | GLY with no additives                                      | Vision Spinner II B e-cigarette operated at 3.8 V with CE4 by eGO (2.6 $\Omega$ coil) vaporizer.                                                                                        | 10925 <sup>b</sup>     | 8314 <sup>b</sup>   | 83699 <sup>b</sup>     |
|       |                             | PG with no additives                                       | Vision Spinner II B e-cigarette operated at 3.8 V with CE4 by eGO (2.6 $\Omega$ coil) vaporizer.                                                                                        | 40068 <sup>b</sup>     | 819 <sup>b</sup>    | 29358 <sup>b</sup>     |
| 2     | 17                          | PG/GLY with tobacco flavor, 0.90% labeled nicotine level.  | The third-generation e-cigarette with Eleaf, ISTICK battery and Kayfun 3.1 atomizer with 1.6 $\Omega$ coil, operated at 5, 10, 15, 20, 25 W.                                            | 348.4 <sup>c</sup>     | 2.5 <sup>c</sup>    | 1559.9 <sup>c</sup>    |
| 3     | 14                          | PG/GLY solution, 2% nicotine, no flavorings added.         | Five "tank system" e-cigarettes with 4 coils ranging from 2.2 to 2.8 $\Omega$ operated at 3.8, 4.2, 4.6, and 5.0 V and one 0.72 $\Omega$ sub-ohm coil operated at 10, 15, 20, and 25 W. | 41000 <sup>b,d</sup>   | 5500 <sup>b,d</sup> | 51000 <sup>b,d</sup>   |
| 4     | 28                          | PG/GLY with tobacco and menthol flavors.                   | Disposable cartridges and rechargeable e-cigarettes.                                                                                                                                    | 320                    | 150                 | NA                     |

|    |       |                                                                                                    |                                                                                                                                                       |                          |                    |                          |
|----|-------|----------------------------------------------------------------------------------------------------|-------------------------------------------------------------------------------------------------------------------------------------------------------|--------------------------|--------------------|--------------------------|
| 5  | 39    | Ten different PG, GLY and PG/GLY mixtures with tobacco and fruit flavors, 18-24 mg/mL of nicotine. | Ego-3 e-cigarette operated at 3.2 V, Crystal 2 clearomizer with 2.4 $\Omega$ heating element.                                                         | 7.13 <sup>b</sup>        | ND                 | 3.93 <sup>b</sup>        |
|    |       | PG, GLY and PG/GLY mixtures with no additives.                                                     |                                                                                                                                                       | 28.66 <sup>b</sup>       | NA                 | 35.33 <sup>b</sup>       |
| 6  | 39    | Twelve e-liquids with tobacco and menthol flavors, 16-18mg/mL of nicotine.                         | Disposable cartridges                                                                                                                                 | 90.6                     | 279                | 374                      |
| 7  | 18    | Solvent composition not available, no nicotine.                                                    | The first-generation device operated with prefilled cartridges.                                                                                       | 8000                     | 3500               | 5000                     |
| 8  | 13-17 | PG/GLY mixture, no additives.                                                                      | "Tank system" e-cigarette, operated at 5.0 V.                                                                                                         | NA                       | NA                 | 38000 (FRA)              |
| 9  | 28    | Solvent composition not available.                                                                 | Three hundred and sixty-three e-cigarettes (13 brands).                                                                                               | 11550 <sup>b</sup>       | 4015 <sup>b</sup>  | 14300 <sup>b</sup>       |
| 10 | 13    | Four e-liquids with tobacco flavor, 24-26 mg/mL of nicotine.                                       | Two-piece cartomizer.                                                                                                                                 | 20.06-65.87 <sup>b</sup> | ND                 | 23.93-55.82 <sup>b</sup> |
| 11 | 23    | E-liquids with tobacco flavor, 16-18 mg/mL of nicotine.                                            | Nine e-cigarettes: Refillable and disposable, non-refillable e-cigarettes.                                                                            | 40.6-106.4               | 9.1-167.3          | 33.6-175                 |
| 12 | 10    | Flavored and unflavored PG/GLY based mixtures, 12-18 mg/mL of nicotine.                            | Two clearomizers with 1.5 and 3.1 $\Omega$ coils operated at 4.0 and 3.9 V, respectively and one cartomizer with 3.4 $\Omega$ coil operated at 4.2 V. | 27700                    | 2720               | 49500                    |
| 13 | 8     | PG/GLY mixtures.                                                                                   | Japanese e-cigarette by "The Plemium Smoker"; no information about device power settings or coil resistance.                                          | 605 <sup>b</sup>         | 511.5 <sup>b</sup> | 456.5 <sup>b</sup>       |

|    |                 |                                                                                      |                                                                                                                                                                                                                    |       |     |      |
|----|-----------------|--------------------------------------------------------------------------------------|--------------------------------------------------------------------------------------------------------------------------------------------------------------------------------------------------------------------|-------|-----|------|
| 14 | 23              | Cartridges with tobacco, menthol, vanilla and cherry, 16 mg/mL of nicotine.          | Cartridge-based electronic cigarette (the first generation), output battery voltage 3.7 V, coil resistance 3.0 $\Omega$ .                                                                                          | 57    | 24  | 62   |
|    |                 | Cartridges with various flavors, including menthol and tobacco, 6 mg/mL of nicotine. | “Tank-type” e-cigarette (the second generation) with iTaste VV V3.0 battery (voltage output of 3.3–5 V) and EVOD2 atomizer by KangerTech (coil resistance 1.5 $\Omega$ ); e-cigarette was tested at 9.1 W (3.7 V). | 6310  | 580 | 4040 |
| 15 | 19 <sup>e</sup> | PG based mixture with "Watermelon Chill" flavor, 0 or 18 mg/mL of nicotine.          | Direct Dripping Atomizer, 2.5 $\Omega$ coil, with eGo-T battery operated at 3.4 V.                                                                                                                                 | 78149 | 131 | 5871 |

<sup>a</sup> Nicotine levels are nominal not actual.

<sup>b</sup> Units were normalized to ng/puff.

<sup>c</sup> Device operated at 20 W.

<sup>d</sup> Maximum yields reported at operational voltage of 5 V.

<sup>e</sup> Actual flow rate.

Figure S1. Experimental set-up.

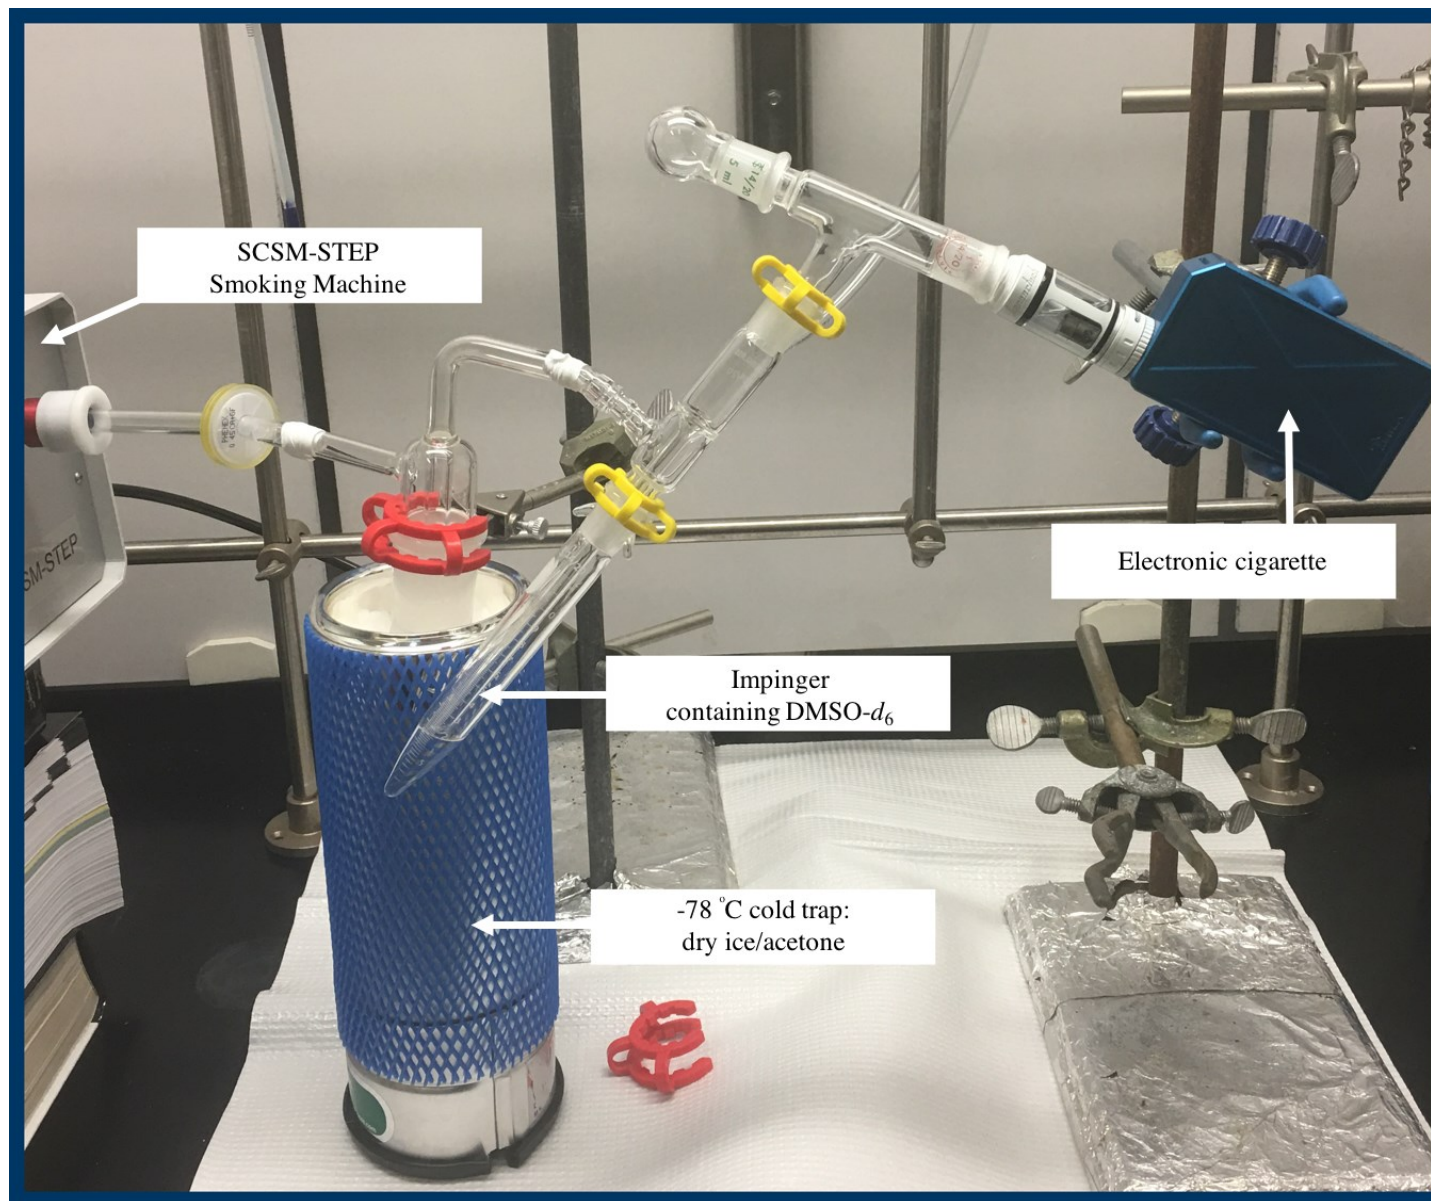

**Table S2.** Levels of detection and quantification for toxicants under investigation.

|     | Acetaldehyde<br>( $\mu\text{g/g}$ ) | Acrolein<br>( $\mu\text{g/g}$ ) | Propanal<br>( $\mu\text{g/g}$ ) | Hydroxyacetone<br>( $\mu\text{g/g}$ ) | Glycolaldehyde<br>( $\mu\text{g/g}$ ) |
|-----|-------------------------------------|---------------------------------|---------------------------------|---------------------------------------|---------------------------------------|
| LOD | 0.268                               | 2.03                            | 1.48                            | 0.328                                 | 0.984                                 |
| LOQ | 0.893                               | 6.78                            | 4.94                            | 1.09                                  | 3.28                                  |

**Figure S2.** Vapor Density.

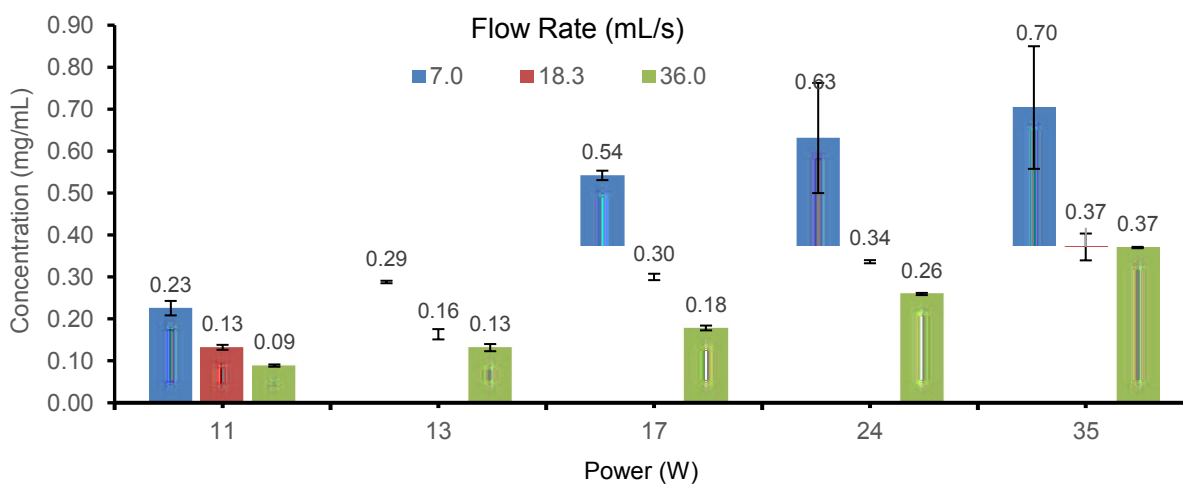

**Figure S3.**  $^1\text{H}$  NMR spectra of representing vaporized samples collected under varying vaping conditions: 18.3 mL/s (spectrum A) and 7.0 mL/s flowrates (spectrum B).

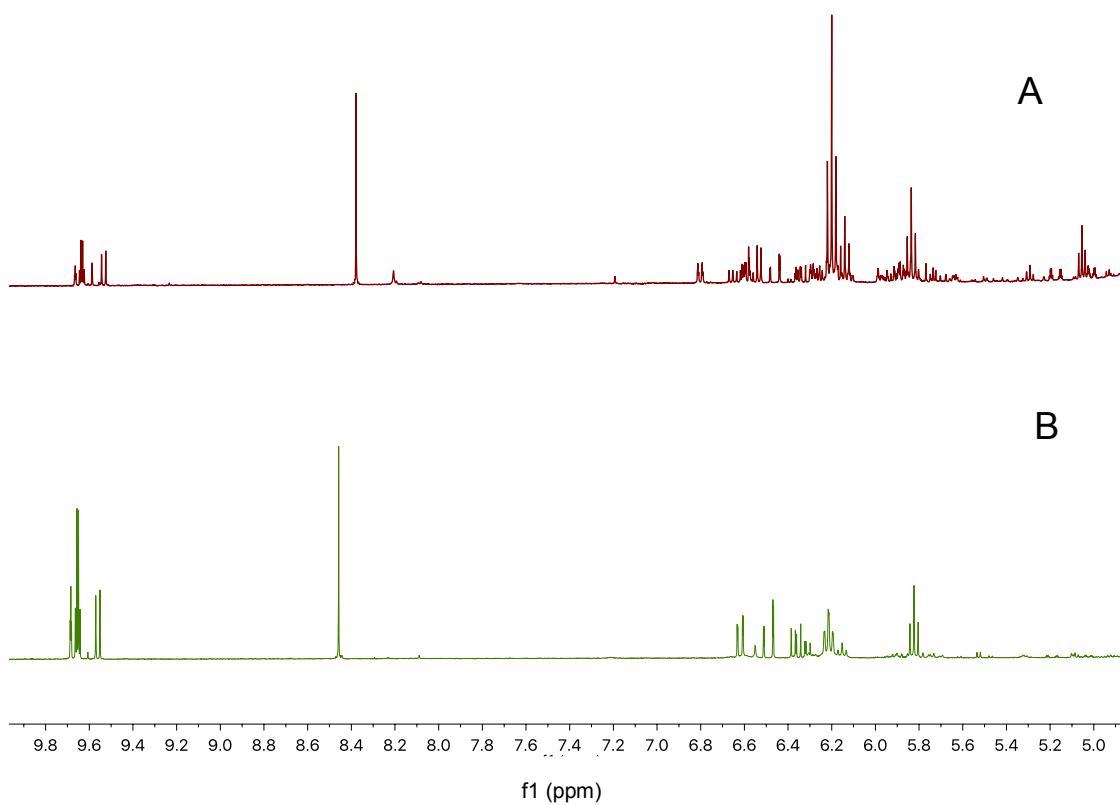

**Figure S4.**  $^1\text{H}$  NMR spectra expansion of representing samples collected under varying vaping conditions: 18.3 mL/s (spectrum A) and 7.0 mL/s flowrates (spectrum B).

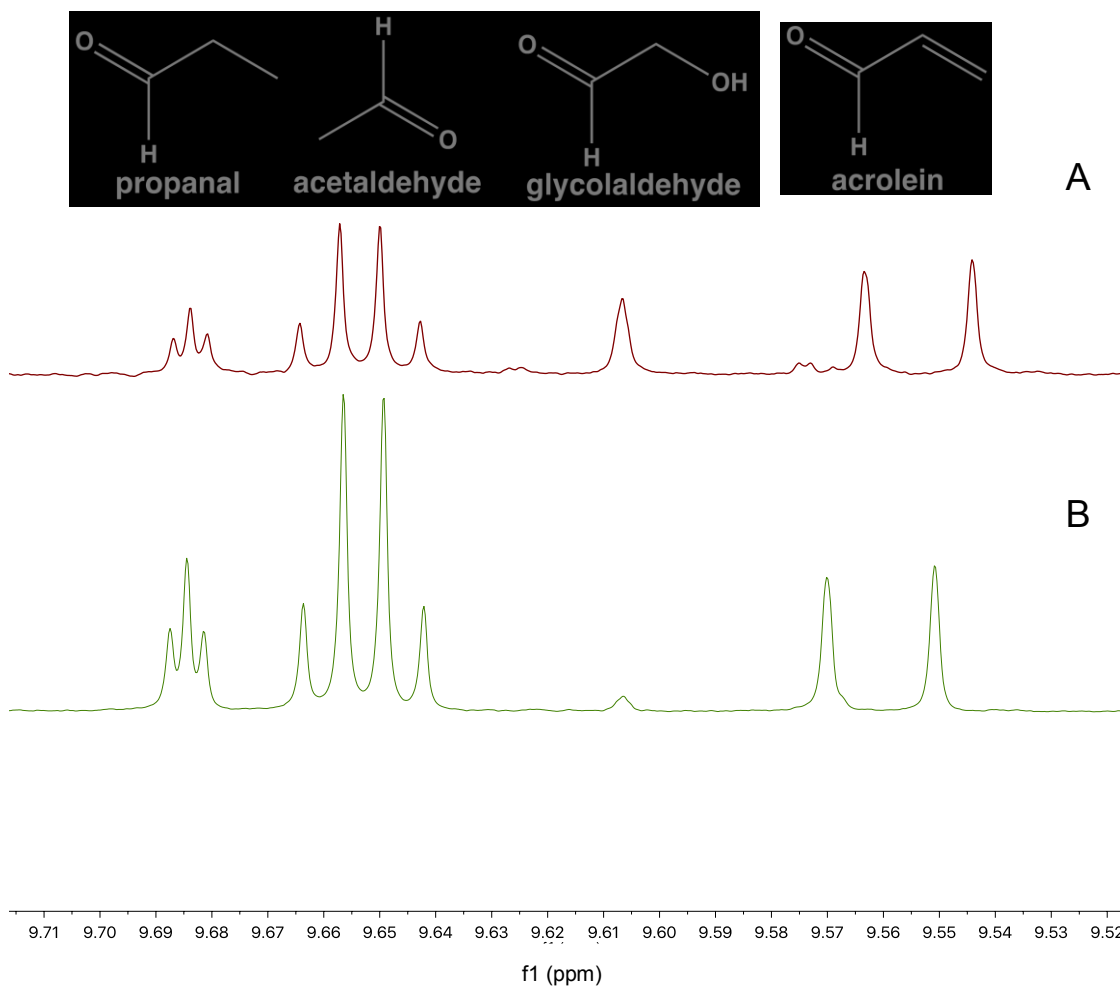



**Figure S5.**  $^1\text{H}$  NMR spectra expansion of representing samples collected under varying vaping conditions: 18.3 mL/s (spectrum A) and 7.0 mL/s flowrates (spectrum B).

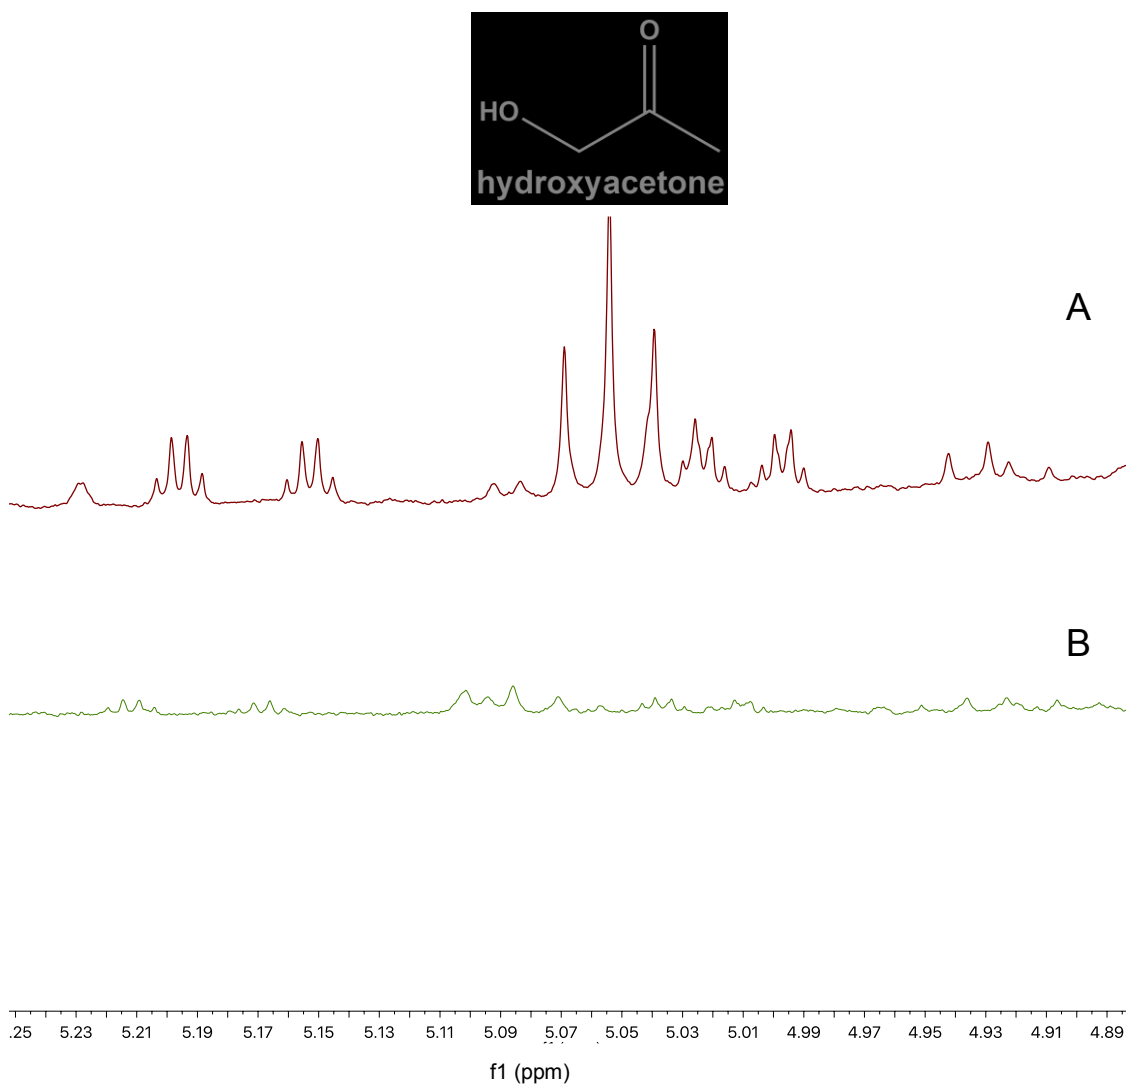

## REFERENCES

- (1) Sleiman, M.; Logue, J. M.; Montesinos, N. V.; Russell, M. L.; Litter, M. I.; Gundel, L. A.; Destailats, H. Emissions from electronic cigarettes: Key parameters affecting the release of harmful chemicals. *Environ. Sci. Technol.* **2016**, *50*, 9644-9651.
- (2) Geiss, O.; Bianchi, I.; Barrero-Moreno, J. Correlation of volatile carbonyl yields emitted by e-cigarettes with the temperature of the heating coil and the perceived sensorial quality of the generated vapours. *Int. J. Hyg. Environ. Health* **2016**, *219*, 268-277.
- (3) Gillman, I. G.; Kistler, K. A.; Stewart, E. W.; Paolantonio, A. R. Effect of variable power levels on the yield of total aerosol mass and formation of aldehydes in e-cigarette aerosols. *Regul. Toxicol. Pharmacol.* **2016**, *75*, 58-65.
- (4) Tayyarah, R.; Long, G. A. Comparison of select analytes in aerosol from e-cigarettes with smoke from conventional cigarettes and with ambient air. *Regul. Toxicol. Pharmacol.* **2014**, *70*, 704-710.
- (5) Kosmider, L.; Sobczak, A.; Fik, M.; Knysak, J.; Zaciera, M.; Kurek, J.; Goniewicz, M. Carbonyl compounds in electronic cigarette vapors: Effects of nicotine solvent and battery output voltage. *Nicotine Tob. Res.* **2014**, *16*, 1319-1326.
- (6) Goniewicz, M.; Knysak, J.; Gawron, M.; Kosmider, L.; Sobczak, A.; Kurek, J.; Prokopowicz, A.; Jablonska-Czapla, M.; Rosik-Dulewska, C.; Havel, C.; Jacob, P.; Benowitz, N. Levels of selected carcinogens and toxicants in vapour from electronic cigarettes. *Tob. Control* **2013**, *23*, 133-139.
- (7) Hutzler, C.; Paschke, M.; Kruschinski, S.; Henkler, F.; Hahn, J.; Luch, A. Chemical hazards present in liquids and vapors of electronic cigarettes. *Arch. Toxicol.* **2014**, *88*, 1295-1308.
- (8) Jensen, R. P.; Luo, W.; Pankow, J. F.; Strongin, R. M.; Peyton, D. H. Hidden formaldehyde in e-cigarette aerosols. *N. Engl. J. Med.* **2015**, *372*, 392-394.
- (9) Uchiyama, S.; Ohta, K.; Ina, Y.; Kunugita, N. Determination of carbonyl compounds generated from the e-cigarette using coupled silica cartridges impregnated with hydroquinone and 2,4-dinitrophenylhydrazine, followed by high-performance liquid chromatography. *Anal. Sci.* **2013**, *29*, 1219-1222.
- (10) McAuley, T. R.; Hopke, P. K.; Zhao, J.; Babaian, S. Comparison of the effects of e-cigarette vapor and cigarette smoke on indoor air quality. *Inhal. Toxicol.* **2012**, *24*, 850-857.
- (11) Laugesen, M. Nicotine and toxicant yield ratings of electronic cigarette brands in New Zealand. *N. Z. Med. J.* **2015**, *128*, 77-82.
- (12) Khlystov, A.; Samburova, V. Flavoring compounds dominate toxic aldehyde production during e-cigarette vaping. *Environ. Sci. Technol.* **2016**, *50*, 13080-13085.
- (13) Uchiyama, S.; Inaba, Y.; Kunugita, N. Determination of acrolein and other carbonyls in cigarette smoke using coupled silica cartridges impregnated with hydroquinone and 2,4-dinitrophenylhydrazine. *J. Chromatogr. A* **2010**, *1217*, 4383-4388.
- (14) Ogunwale, M. A.; Li, M.; Raju, M. V.; Chen, Y.; Nantz, M. H.; Conklin, D. J.; Fu, X.-A. Aldehyde detection in electronic cigarette aerosols. *ACS omega* **2017**, *2*, 1207-1214.
- (15) Talih, S.; Balhas, Z.; Salman, R.; Karaoghlanian, N.; Shihadeh, A. "Direct dripping": A high-temperature, high-formaldehyde emission electronic cigarette use method. *Nicotine Tob. Res.* **2015**, *18*, 453-459.
